# Supplementary material
Source: PubMed Central journal article supplement (PMC4536569)
Supplement: NIHMS699316-supplement-Supplemental_Data_File__doc__pdf__etc__.pdf [file NIHMS699316-supplement-Supplemental_Data_File__doc__pdf__etc__.pdf]

**Supplemental Table: Grade 3/4 Non-Hematologic Adverse Events by Treatment Regimen and Dose Level**

| Toxicity                       | 3 Drug Regimen *                   |         | 4 Drug Regimen                     |         |                                     |         |
|--------------------------------|------------------------------------|---------|------------------------------------|---------|-------------------------------------|---------|
|                                | 1.5 mg/m <sup>2</sup> /day (n = 4) |         | 1.0 mg/m <sup>2</sup> /day (n = 8) |         | 1.5 mg/m <sup>2</sup> /day (n = 11) |         |
|                                | Grade 3                            | Grade 4 | Grade 3                            | Grade 4 | Grade 3                             | Grade 4 |
| <b>Hepatic</b>                 |                                    |         |                                    |         |                                     |         |
| Elevated AST                   |                                    | 1       |                                    | 1       |                                     | 1       |
| Elevated ALT                   |                                    |         | 2                                  | 1       | 5                                   | 1       |
| Elevated Bilirubin             |                                    |         | 2                                  |         | 3                                   | 1       |
| <b>Blood</b>                   |                                    |         |                                    |         |                                     |         |
| Hemorrhage                     |                                    |         |                                    | 1       |                                     |         |
| PTT                            |                                    |         |                                    |         | 2                                   |         |
| <b>Cardiovascular</b>          |                                    |         |                                    |         |                                     |         |
| Hypotension                    |                                    |         |                                    |         | 1                                   | 1       |
| Hypertension                   |                                    |         |                                    |         | 2                                   |         |
| Cardiac Ischemia               |                                    |         | 1                                  |         |                                     |         |
| Cardiac Function               |                                    |         |                                    |         |                                     | 1       |
| <b>Metabolic</b>               |                                    |         |                                    |         |                                     |         |
| Sodium                         |                                    |         | 1                                  |         |                                     |         |
| Potassium                      |                                    |         | 2                                  |         |                                     |         |
| Glucose                        |                                    |         |                                    |         | 3                                   | 1       |
| BUN                            |                                    |         |                                    |         |                                     | 1       |
| Creatinine                     |                                    |         |                                    |         |                                     | 1       |
| Calcium                        |                                    |         |                                    |         | 1                                   |         |
| <b>Renal and Genitourinary</b> |                                    |         |                                    |         |                                     |         |
| Systolic BP                    |                                    |         | 1                                  | 1       |                                     |         |
| Diastolic BP                   |                                    |         | 1                                  | 1       | 1                                   |         |
| <b>Gastrointestinal</b>        |                                    |         |                                    |         |                                     |         |
| Stomatitis                     |                                    |         |                                    | 1       |                                     |         |
| Constipation                   |                                    |         | 1                                  |         |                                     |         |
| <b>Neurologic</b>              |                                    |         |                                    |         |                                     |         |
| General                        |                                    |         | 1                                  | 1       |                                     |         |
| Motor                          | 1                                  |         | 1                                  |         |                                     |         |
| Cortical                       |                                    |         |                                    | 1       |                                     |         |
| Headache                       | 1                                  |         |                                    |         |                                     |         |
| <b>Pulmonary</b>               |                                    |         |                                    |         |                                     |         |
| Vital Capacity                 |                                    |         |                                    | 1       |                                     |         |
| Function                       | 1                                  |         | 1                                  |         |                                     | 1       |
| <b>Infection</b>               |                                    |         | 1                                  |         |                                     | 2       |
| <b>Pain (general)</b>          |                                    |         | 1                                  |         |                                     |         |
| <b>Performance Status</b>      |                                    |         | 1                                  | 1       |                                     | 1       |
| <b>Vascular Capillary Leak</b> | 2                                  |         | 4                                  |         |                                     | 1       |
| <b>Myalgias</b>                | 1                                  |         |                                    | 1       | 1                                   |         |
| <b>Skin</b>                    | 1                                  |         |                                    |         |                                     |         |

\* On the 3-drug treatment regimen at the 2.0 mg/m<sup>2</sup>/day dose level (n = 1) - only one grade 3 toxicity was observed, capillary leak syndrome.
